# Supplementary material
Source: publisher figshare collection journal article supplement (https://acs.figshare.com/ndownloader/files/13868513)
Supplement: Supplementary file 1 [file 13868513]

# CdSe Quantum Dots/g-C<sub>3</sub>N<sub>4</sub> Heterostructure for Efficient H<sub>2</sub> Production under Visible Light Irradiation

Yunqian Zhong<sup>‡,§</sup>, Weiwei Chen<sup>‡,§</sup>, Shan Yu<sup>\*,‡</sup>, Zhanghui Xie<sup>‡</sup>, Shiqian Wei<sup>‡</sup>, Ying Zhou<sup>\*,‡,‡</sup>

<sup>†</sup> State Key Laboratory of Oil and Gas Reservoir and Exploitation, Southwest Petroleum University, Chengdu 610500, China.

<sup>‡</sup> The Center of New Energy Materials and Technology, School of Materials Science and Engineering, Southwest Petroleum University, No. 8, Xindu Road, Chengdu 610500, China

## AUTHOR INFORMATION

### Corresponding Author

\* E-mail: [yushan@mail.ipc.ac.cn](mailto:yushan@mail.ipc.ac.cn) (S.Y).

\* E-mail: [yzhou@swpu.edu.cn](mailto:yzhou@swpu.edu.cn) (Ying Zhou).

§ Y.Z. and W.C. contributed equally to this work. contributed equally to this work.

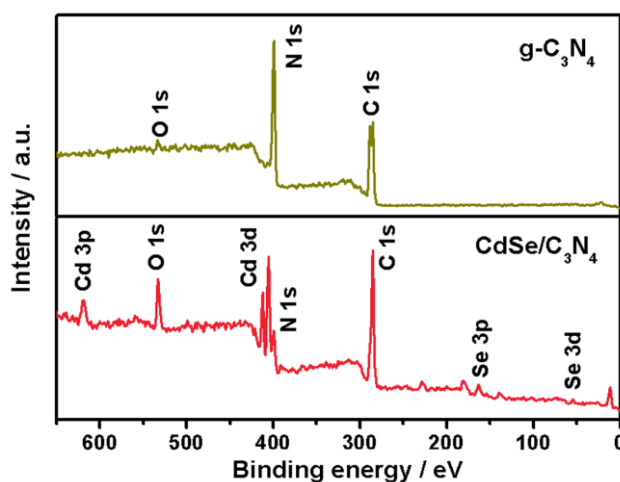

**Figure S1.** Full XPS spectra of the pure g-C<sub>3</sub>N<sub>4</sub> and CdSe/C<sub>3</sub>N<sub>4</sub>.

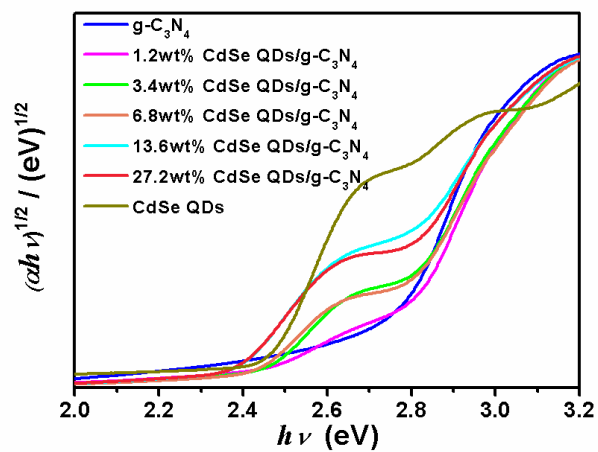

**Figure S2.** Plots of  $(\alpha h\nu)^{1/2}$  versus  $h\nu$  for the samples.

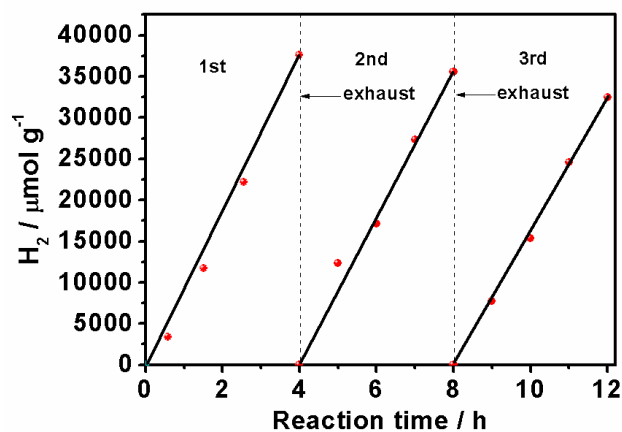

**Figure S3.** Cyclic  $H_2$ -evolution curve for the CdSe QDs/g- $C_3N_4$  sample.

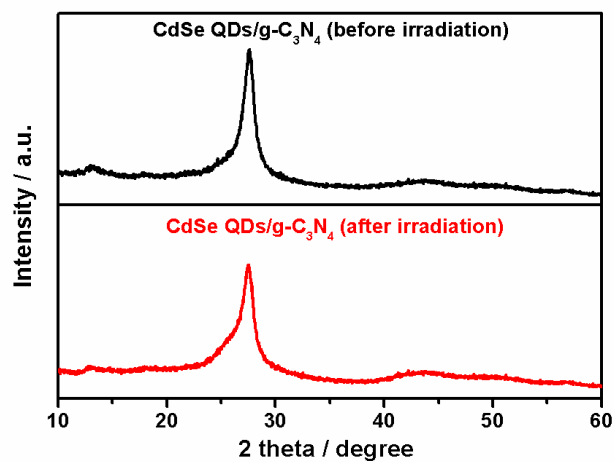

**Figure. S4.** XRD patterns of CdSe QDs/g- $C_3N_4$  before and after irradiation.

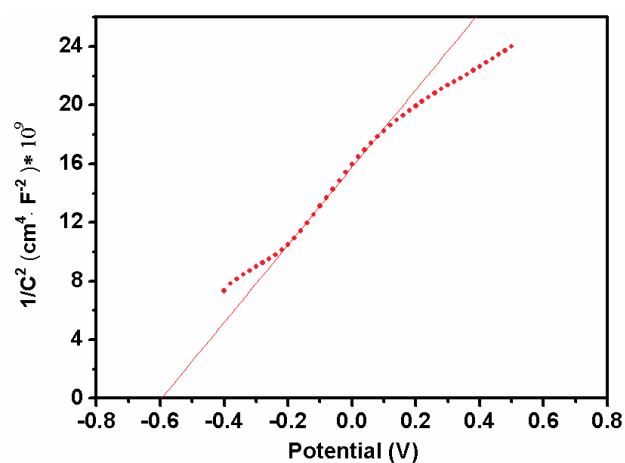

**Figure S5.** Mott-Schottky (MS) plots of g-C<sub>3</sub>N<sub>4</sub>.

**Table S1.** Optical absorption cut off and corresponding band gap of all the samples.

| Sample                                            | Optical cutoff (nm) | Band gap (eV) |
|---------------------------------------------------|---------------------|---------------|
| g-C <sub>3</sub> N <sub>4</sub>                   | 450                 | 2.76          |
| 1.2 wt% CdSe QDs/g-C <sub>3</sub> N <sub>4</sub>  | 445                 | 2.78          |
| 3.4 wt% CdSe QDs/g-C <sub>3</sub> N <sub>4</sub>  | 450                 | 2.76          |
| 6.8 wt% CdSe QDs/g-C <sub>3</sub> N <sub>4</sub>  | 452                 | 2.74          |
| 13.6 wt% CdSe QDs/g-C <sub>3</sub> N <sub>4</sub> | 450                 | 2.76          |
| 27.2 wt% CdSe QDs/g-C <sub>3</sub> N <sub>4</sub> | 450                 | 2.76          |
| CdSe QDs                                          | 490                 | 2.53          |
